# FlyBrainLab: Accelerating the Discovery of the Functional Logic of the *Drosophila* Brain in the Connectomic/Synaptic Era

Aurel A. Lazar<sup>1,\*</sup>, Tingkai Liu<sup>1</sup>, Mehmet Kerem Turkcan<sup>1</sup> and Yiyin Zhou<sup>1</sup>

<sup>1</sup>*Department of Electrical Engineering, Columbia University, New York, NY 10027, USA*

<sup>1</sup>*The authors' names are listed in alphabetical order.*

<sup>\*</sup>*Corresponding author. Email address: aurel@ee.columbia.edu*

August 17, 2020

## Abstract

In recent years, a wealth of *Drosophila* neuroscience data have become available. These include cell type, connectome and synaptome datasets for both the larva and adult fly. To facilitate integration across data modalities and to accelerate the understanding of the functional logic of the fly brain, we developed an interactive computing environment called FlyBrainLab.

FlyBrainLab is uniquely positioned to accelerate the discovery of the functional logic of the *Drosophila* brain. Its interactive *open source* architecture seamlessly integrates and brings together computational models with neuroanatomical, neurogenetic and electrophysiological data, changing the organization of neuroscientific fly brain data from a group of seemingly disparate databases, arrays and tables, to a well structured data and executable circuit repository.

The FlyBrainLab User Interface supports a highly intuitive and automated workflow that streamlines the 3D exploration and visualization of fly brain circuits, and the interactive exploration of the functional logic of executable circuits created directly from the explored and visualized fly brain data. Furthermore, efficient comparisons of circuit models are supported, across models developed by different researchers, across different developmental stages of the fruit fly and across different datasets.

The FlyBrainLab Utility Libraries help untangle the graph structure of neural circuits from raw connectome and synaptome data. The Circuit Libraries facilitate the exploration of neural circuits of the neuropils of the central complex and, the development and implementation of models of the adult and larva fruit fly early olfactory systems.

Seeking to transcend the limitations of the connectome, FlyBrainLab provides additional libraries for molecular transduction arising in sensory coding in vision and olfaction. Together with sensory neuron activity data, these libraries serve as entry points for discovering circuit function in the sensory systems of the fruit fly brain. They also enable the biological validation of developed executable circuits within the same platform.

## 37 Introduction

38 The era of connectomics/synaptomics ushered in the advent of large-scale availability of  
39 highly complex fruit fly brain data [1], [2], [3], [4], while simultaneously highlighting the  
40 dearth of computational tools with the speed and scale that can be effectively deployed to  
41 uncover the functional logic of fly brain circuits. In the early 2000's, automation tools intro-  
42 duced in computational genomics significantly accelerated the pace of gene discovery from  
43 the large amounts of genomic data. Likewise, there is a need to develop tightly integrated  
44 computing tools that automate the process of 3D exploration and visualization of fruit fly  
45 brain data with the interactive exploration of executable circuits.

46 To meet this challenge we have built an open source interactive computing platform called  
47 FlyBrainLab. FlyBrainLab is uniquely positioned to accelerate the discovery of the func-  
48 tional logic of the Drosophila brain. It is designed with three main capabilities in mind:  
49 1) 3D exploration and visualization of fruit fly brain data, 2) creation of executable cir-  
50 cuits directly from the explored and visualized fly brain data in step 1), and 3) interactive  
51 exploration of the functional logic of the executable circuits devised in step 2) (see Figure  
52 1).

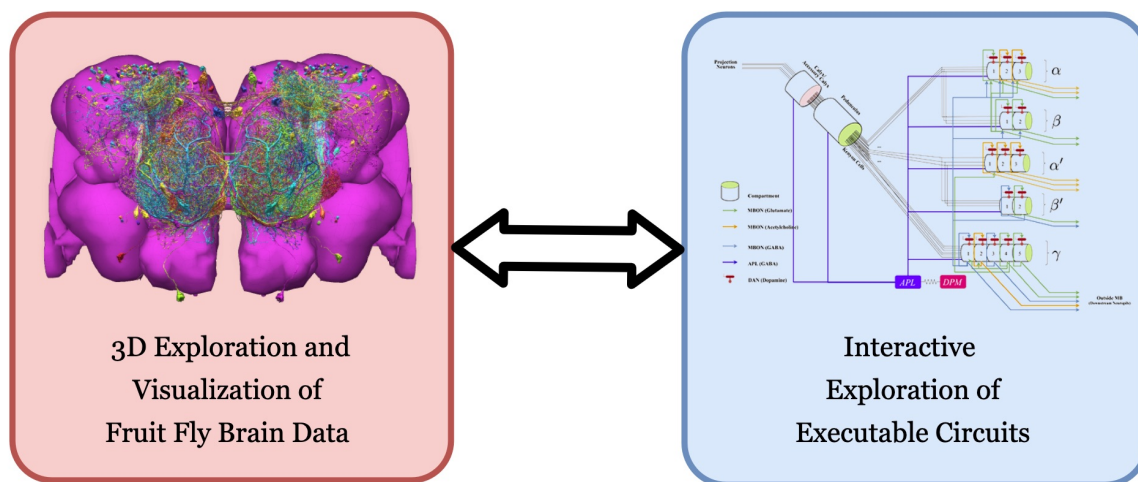

**Figure 1:** FlyBrainLab provides, within a single working environment, 3D visualization and exploration of connectome data, interactive exploration of executable circuit diagrams and real-time code execution.

53 To achieve a tight integration of the three main capabilities into the single working en-  
54 vironment sketched in Figure 1, FlyBrainLab exhibits an architecture (see Supplementary  
55 Figure 1) with a number of key backend services provided by the NeuroArch Database [5]  
56 and the Neurokernel Execution Engine [6], and the NeuroMynerva front-end supporting an  
57 integrated 3D graphics user interface (GUI) (see also Supplementary Figure 2). The key  
58 feature of the FlyBrainLab architecture is the tight integration between the NeuroArch and  
59 Neurokernel components that is further reinforced by NeuroMynerva. The tight integration  
60 is critical for achieving the automated exploration of fly brain data and the rapid creation  
61 and exploration of the function of executable circuits.

62 To accelerate the generation of executable circuits from biological data, NeuroMynerva sup-  
63 ports the following workflow (see also Supplementary Figure 2).

64 First, the 3D GUI (see Supplementary Figure 2, top left) supports the visual exploration of fly  
65 brain data, including neuron morphology, synaptome, and connectome from all available data  
66 sources, stored in the custom-built NeuroArch Database [5]. With plain English queries (see  
67 Supplementary Figure 2, top left), a layperson can perform sophisticated database queries  
68 with only knowledge of fly brain neuroanatomy [7].

69 Second, the circuit diagram GUI (see Supplementary Figure 2, top right) enables the in-  
70 teractive exploration of executable circuits stored in the NeuroArch Database. By retriev-  
71 ing tightly integrated biological data and executable circuit models from the NeuroArch  
72 Database, NeuroMynerva supports the interaction and interoperability between the biologi-  
73 cal circuit built for morphological visualization and the executable circuit created and repre-  
74 sented as an interactive circuit diagram, and allows them to build on each other. This helps  
75 circuit developers to more readily identify the modeling assumptions and the relationship  
76 between neuroanatomy, neurocircuitry and neurocomputation.

77 Third, the Neurokernel [6] Execution Engine provides circuit execution on multiple comput-  
78 ing nodes/GPUs. The tight integration in the database also allows the execution engine  
79 to fetch executable circuit directly from the NeuroArch Database. The tight integration  
80 between NeuroArch and Neurokernel is reinforced and made user transparent by NeuroMyn-  
81 erva.

82 Finally, the GUIs can operate in tandem with command execution in Jupyter notebooks (see  
83 also Supplementary Figure 2, bottom center). Consequently, fly brain circuits and circuit  
84 diagrams can be equivalently processed using API calls from Python, thereby ensuring the  
85 reproducibility of the exploration of similar datasets with minimal modifications.

86 Analysis, evaluation and comparison of circuit models, either among versions developed by  
87 one's own, or among those published in literature, are often critical steps towards discovering  
88 the functional logic of brain circuits. Three types of analyses, evaluations and comparisons  
89 are of particular interest. First, starting from a given dataset and after building a number  
90 of circuit models published in the literature, analyze and compare them under the same  
91 evaluation criteria. Second, automate the construction of executable circuits from datasets  
92 gathered by different labs and, analyze, evaluate and compare the different circuit realiza-  
93 tions. Third, analyze, evaluate and compare fruit fly brain circuits at different developmental  
94 stages. In what follows, we present results, supported by the FlyBrainLab Circuits Libraries  
95 (see Methods), demonstrating the comprehensive evaluation, analysis and comparison capa-  
96 bility of FlyBrainLab.

## 97 Results

### 98 Analyzing, Evaluating and Comparing Circuit Models of the Fruit Fly Central 99 Complex

100 We first demonstrate the workflow supported by FlyBrainLab for analyzing, evaluating and  
101 comparing circuit models of the fruit fly Central Complex (CX) based on the FlyCircuit  
102 dataset [1]. The circuit connecting the ellipsoid body (EB) and the protocerebral bridge  
103 (PB) in the CX has been shown to exhibit ring attractor dynamics [11–13]. Recently, a  
104 number of researches investigated circuit mechanisms underlying these dynamics. Here, we  
105 developed a CXcircuits Library for analyzing, evaluating and comparing various CX circuit  
106 realizations. Specifically, we implemented 3 of the circuit models published in the literature,  
107 called here model A [8], model B [9], and model C [10], and compared them in the same  
108 FlyBrainLab programming environment.

109 In Figure 2(a1, b1, c1), the anatomy of the neuronal circuits considered in model A, B  
110 and C, is respectively depicted. The corresponding interactive circuit diagram is shown in  
111 Figure 2(a2, b2, c2). Here, model A provides the most complete interactive CX circuit,  
112 including the core subcircuits for characterizing the PB-EB interaction with the EB-LAL-  
113 PB, PB-EB-LAL, PB-EB-NO, PB local and EB ring neurons (see Methods and [8] for  
114 commonly used synonyms). Models B and C exhibit different subsets of the core PB-EB  
115 interaction circuit in model A. While no ring neurons are modeled in model B, PB local  
116 neurons are omitted in model C. They, however, do not model other neurons in the CX, *e.g.*,  
117 those that innervate the FB.

118 In Supplementary Video 1, we demonstrate the interactive capabilities of the three models  
119 side-by-side, including the visualization of the morphology of CX neurons and the corre-  
120 sponding executable circuits, user interaction with the circuit diagram revealing connectiv-  
121 ity pattern, and the execution of the circuit. In the video, the visual stimulus depicted in  
122 Figure 2(d3) was presented to all three models (see Methods for the details of generating the  
123 input stimulus for each model). The responses, measured as the mean firing rate of EB-LAL-  
124 PB neurons within contiguous EB wedges, are shown in Figure 2(a4, b4, c4), respectively.  
125 Insets depict the responses at 10, 20 and 30 seconds. During the first second, a moving bar  
126 in its fixed initial position and a static bar are presented. The moving bar displays a higher  
127 brightness than the static bar. All three models exhibited a single-bump (slightly-delayed)  
128 response tracking the position of the moving bar. The widths of the bumps were different,  
129 however. After 30 seconds, the moving bar disappeared and models A and B shifted to track  
130 the location of the static bar, whereas the bump in model C persisted in the same position  
131 where the moving bar disappeared. Furthermore, for models B and C but not for model A,  
132 the bumps persisted after the removal of the visual stimulus (after 33 seconds), as previously  
133 observed *in vivo* [11, 12].

134 By comparing these circuit models, we notice that, to achieve the ring attractor dynamics,  
135 it is critical to include global inhibitory neurons, *e.g.*, PB local neurons in models A and  
136 B, and ring neurons in models A and C. The model A ring neurons featuring a different  
137 receptive field and the ring neurons in model C receiving spike train input play a similar

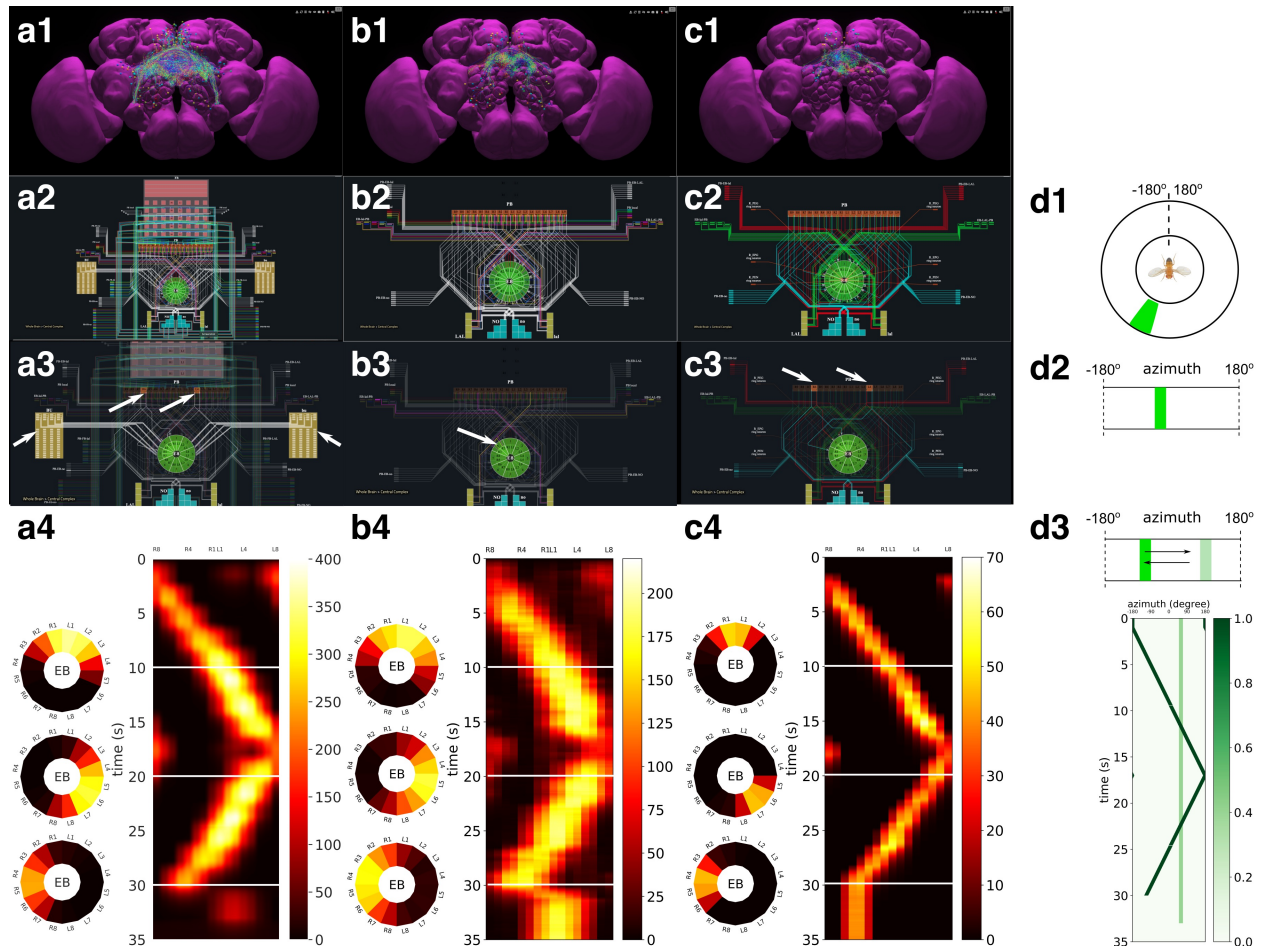

**Figure 2:** Analysis, evaluation and comparison of 3 models of CX published in the literature. (a) Model A [8], (b) Model B [9], (c) Model C [10]. (a1, b1, c1) Morphology of the neurons visualized in the NeuroNLP window (see Supplementary Figure 2). (a2, b2, c2) Neuronal circuits in the NeuroNLP window depicted in the NeuroGFX window (see Supplementary Figure 2) as abstract interactive circuit diagrams. The naming of the ring neurons in (c2) follows [10]. (a3, b3, c3) When a single vertical bar is presented in the visual field (d1/d2), different sets of neurons/subregions (highlighted) in each of the models, respectively, receive either current injections or external spike inputs. (a4, b4, c4) The mean firing rates of the EB-LAL-PB neurons innervating each of the EB wedges of the 3 models (see Methods), in response to the stimulus shown in (d3). Insets show the rates at 10, 20, and 30 seconds, respectively, overlaid onto the EB ring. (d1) A schematic of the visual field surrounding the fly. (d2) The visual field flattened. (d3) Input stimulus consisting of a bar moving back and forth across the screen, and a second fixed bar at  $60^\circ$  and with lower brightness.

138 functional role. However, to achieve the ring attractor dynamics characterized by a single  
139 bump response to multiple bars and persistent bump activity after the removal of the vertical  
140 bar, model C only required three out of the five core neuron types (see Methods), whereas  
141 model B requires all all four neuron types included.

## 142 **Analyzing, Evaluating and Comparing of Adult Antenna and Antennal Lobe** 143 **Circuit Models Based upon the FlyCircuit and Hemibrain Datasets**

144 In the second example we demonstrate the effect on modeling the antenna and antennal  
145 lobe circuits due to, respectively, the FlyCircuit [1] and the Hemibrain [4] datasets (see also  
146 Methods).

147 We start by exploring and analyzing the morphology and connectome of the olfactory sen-  
148 sory neurons (OSNs), antennal lobe projection neurons (PNs) and local neurons (LNs) of  
149 the FlyCircuit [1] and the Hemibrain [4] datasets (see Figure 3). The high resolution elec-  
150 tron microscopy reveals new connectivity motifs in the Hemibrain dataset between olfactory  
151 sensory neurons, projection neurons and local neurons (see Fig. 3(a)). Following [14], we  
152 first constructed the two layer circuit shown in Figure 3(b) (left) and then constructed a  
153 more extensive connectome/synaptome model of the adult antennal lobe shown in Fig. 3(b)  
154 (right).

155 Execution of and comparison of the results of these two circuit models show quantitatively  
156 different PN output activity in steady-state (Fig. 3(c)) and for transients (Fig. 3(d)). A  
157 prediction [14, 16] made by the antenna and antennal lobe circuit shown in Figure 3(b) (left)  
158 using the FlyCircuit data has been that the PN activity, bundled according to the source  
159 glomerulus, is proportional to the vector characterizing the affinity of the odorant-receptor  
160 pairs (Fig. 3(c), left column).

161 The transient and the steady state activity response are further highlighted in Figure 3(d)  
162 for different amplitudes of the odorant stimulus waveforms. The initial results show that the  
163 circuit on the right detects with added emphasis the beginning and the end of the odorant  
164 waveforms.

165 The complex connectivity between OSNs, LNs and PNs revealed by the Hemibrain dataset  
166 suggests that the adult antennal lobe circuit encodes additional odorant representation fea-  
167 tures [4].

## 168 **Analyzing, Evaluating and Comparing Early Olfactory Circuit Models of the** 169 **Larva and the Adult Fruit Flies**

170 In the third example, we investigate the difference in odorant encoding and processing in the  
171 *Drosophila* Early Olfactory System (EOS) at two different developmental stages, the adult  
172 and larva (see also Methods).

173 We start by exploring and analyzing the morphology and connectome for the Olfactory  
174 Sensory Neurons (OSNs), Antennal Lobe Projection Neurons (PNs) and Local Neurons (LNs)  
175 of the adult Hemibrain [4] dataset and the LarvaEM dataset (see Figure 4 (a)).

176 Detailed connectivity information informed the model construction for both the adult and  
177 larva EOS, that we developed based on parameterized versions of the previous literature [14].

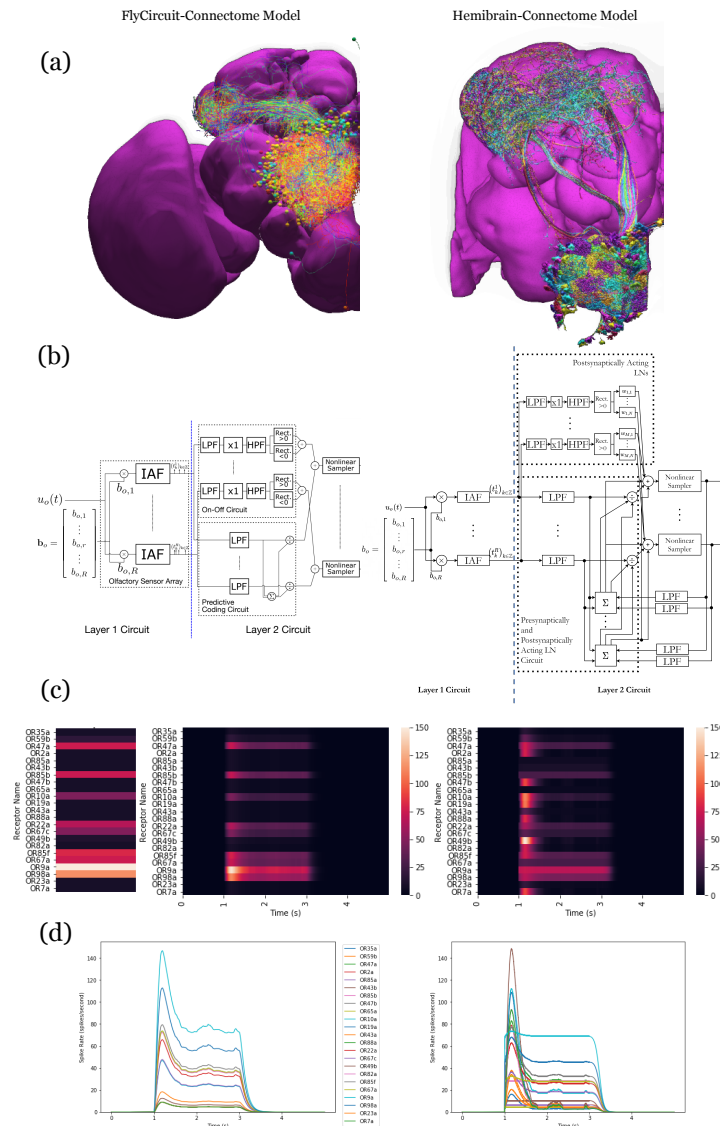

**Figure 3:** Analysis, evaluation and comparison between 2 models of the antenna and antennal lobe circuit of the adult fly based on the FlyCircuit (left) dataset [14] and an exploratory model based on the Hemibrain (right) dataset [4]. (a) Morphology of olfactory sensory neurons, local neurons and projection neurons in the antennal lobe for the two datasets. The axons of the projection neurons and their projections to the mushroom body and lateral horn are also visible. (b) Circuit diagrams depicting the antenna and antennal lobe circuit motifs derived from the two datasets. (c) Response of the antenna/antennal lobe circuit to a constant ammonium hydroxide step input applied between 1s and 3s of a 5 second simulation; (left) the interaction between the odorant and 23 olfactory receptors is captured as the vector of affinity values; (middle and right) a heatmap of the uniglomerular PN PSTH values (spikes/second) grouped by glomerulus for the 2 circuit models. (d) The PN response transients of the 2 circuit models for uniform noise input with a minimum of 0ppm and a maximum of 100ppm preprocessed with a 30Hz low-pass filter [15] and delivered between 1s and 3s.

178 In particular, the larval model includes fewer number of OSNs, PNs and LNs in Antenna  
179 and Antennal Lobe circuit as shown in Fig. 4(b) right.

180 The adult and larval EOS models were simultaneously evaluated on a collection of mono-  
181 molecular odorants whose binding affinities to odorant receptors have been estimated from  
182 physiological recordings (see also Methods). In Figure 4(c) (left), the affinity values are shown  
183 for the odorant receptors that are only in the adult fruit fly (top panel), that appear in both  
184 the adult and the larva (middle panel) and, finally, that are only in the larva. The steady-  
185 state responses of the Antenna and Antennal Lobe circuit for both models are computed and  
186 shown in Figure.4 (c) (middle and right, respectively). Visualized in juxtaposition alongside  
187 the corresponding affinity vectors, we observe stark contrast in odorant representation at all  
188 layers of the circuit between adult and larva, raising the question of how downstream circuits  
189 can process differently represented odorant identities and instruct similar olfactory behavior  
190 across development. Settling such questions require additional physiological recordings, that  
191 may improve the accuracy of the current FlyBrainLab EOS circuit models.



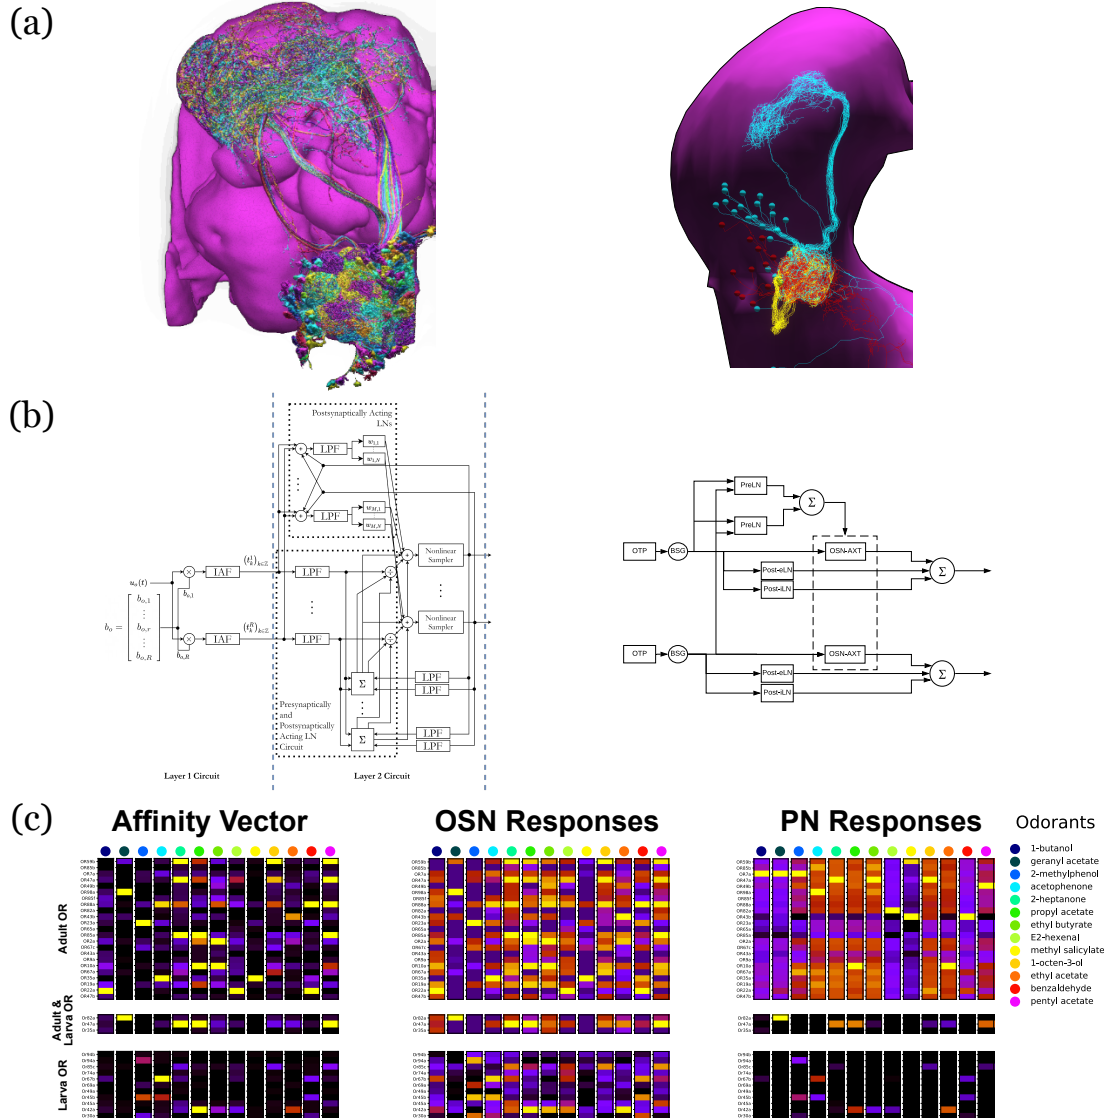

**Figure 4:** Evaluation and Comparison of two *Drosophila* Early Olfactory System (EOS) models describing adult (*left*, developed based on Hemibrain dataset) and larval (*right*, developed based on LarvaEM dataset) circuits. (a) Morphology of Olfactory Sensory Neurons (OSNs) in the Antenna (ANT), Local Neurons (LNs) in the Antennal Lobe (AL) and Projection Neurons in the AL. (b) Circuit diagrams depicting the Antenna and Antennal Lobe circuit motifs. (c) (left) Interaction between 13 odorants and 37 odorant receptors (ORs) characterized by affinity values. The ORs expressed only in the adult fruit flies are grouped in the top panel; the ones that are expressed in both the adult and the larva are grouped in the middle panel; and those expressed only in the larva are shown in the bottom panel. Steady-state outputs of the EOS models to a step concentration waveform of 100 ppm are used to characterize combinatorial codes of odorant identities at the OSN level (middle) and the PN level (right)

## 192 Discussion

193 Historically, a large number of visualization and computational tools have been developed  
194 primarily designed for either neurobiological studies (see Figure 1 (left) or computational  
195 studies (see Figure 1 (right)). These are briefly discussed below.

196 The computational neuroscience community has invested a significant amount of effort in  
197 developing tools for analyzing and evaluating model neural circuits. A number of simu-  
198 lation engines have been developed, including general simulators such as NEURON [17],  
199 NEST [18], Brian [19], Nengo [20], Neurokernel [6], DynaSim [21], and the ones that spe-  
200 cialize in multi-scale simulation, *e.g.*, MOOSE [22], in compartmental models, *e.g.*, AR-  
201 BOR [23], and in fMRI-scale simulation *e.g.*, Virtual Brain [24, 25]. Other tools offer  
202 to improve the accessibility of these simulators by facilitating the creation of large-scale  
203 neural networks, *e.g.*, BMTK [26] and NetPyNe [27], and by providing a common inter-  
204 face, simplifying the simulation workflow and streamlining parallelization of simulation,  
205 *e.g.*, PyNN [28], Arachne [29] and NeuroManager [30]. To facilitate access and exchange  
206 of neurobiological data worldwide, a number of model specification standards have been  
207 worked upon in parallel including MorphML [31], NeuroML [32], SpineML [33] and SONATA  
208 (<https://github.com/AllenInstitute/sonata>).

209 Even with the help of these computational tools, it still takes a substantial amount of manual  
210 effort to build executable circuits from real data provided, for example, by model databases  
211 such as ModelDB/NeuronDB [34] and NeuroArch [5]. Moreover with the ever expanding  
212 size of the fly brain datasets, it has become more difficult to meet the demand of creating  
213 executable circuits that can be evaluated with different datasets. In addition, with very  
214 few exceptions, comparisons of circuit models, a standard process in the computer science  
215 community, are rarely available in the computational neuroscience literature.

216 Substantial efforts by the system neuroscience community went into developing tools for  
217 visualizing the anatomy of the brain. A number of tools have been developed to provide in-  
218 teractive, web-based interfaces that allow neurobiologists to extensively explore and visualize  
219 neurobiological information of the fruit fly brain and ventral nerve cord, for both the adult  
220 [1, 4] and the larva [2, 35]. These include the FlyCircuit [1], the Fruit Fly Brain Observatory  
221 (FFBO/NeuroNLP) [7], Virtual Fly Brain [36], neuPrintExplorer [37], and CATMAID [38].  
222 Similar tools have been developed for other model organisms, such as the Allen Mouse Brain  
223 Connectivity Atlas [39], the WormAtlas for *C. elegans* (<http://www.wormatlas.org>) and  
224 the Z Brain for zebra fish [40]. A number of projects, *e.g.*, [41], offer a more specialized  
225 capability for visualizing and analyzing neuroanatomy data.

226 Although primarily designed for guidance in system experimentation, these visualization  
227 tools have significantly improved the access to and exploration of brain data. A number  
228 of these efforts started to bridge the gap between neurobiological data and computational  
229 modeling including the Geppetto [42], the OpenWorm [43] and the Open Source Brain [44]  
230 initiatives and the Brain Simulation Platform of the Human Brain Project [45].

231 Without information linking circuit activity/computation to the structure of the underlying  
232 neuronal circuits, understanding the function of brain circuits remains, however, elusive.

233 Lacking a systematic method of automating the process of creating and exploring the function  
234 of executable circuits at the brain or system scale levels hinders the application of these tools  
235 when composing more and more complex circuits. Furthermore, these tools fall short of  
236 offering the capability of generating static circuit diagrams, let alone interactive ones. The  
237 experience of VLSI design, analysis and evaluation of computer circuits might be instructive  
238 here. An electronic circuit engineer reads a circuit diagram of a chip, rather than the 3D  
239 structure of the tape-out, to understand its function, although the latter ultimately realizes it.  
240 Similarly, visualization of a biological circuit alone, while powerful and intuitive for building  
241 a neural circuit, provides little insights into the function of the circuit. While simulations  
242 can be done without a circuit diagram, understanding how an executable circuit leads to its  
243 function remains elusive.

244 The tools discussed above all fall short of offering an integrated infrastructure that can  
245 effectively leverage the ever expanding connectomic/synaptic and neurophysiology data  
246 for creating and exploring executable fly brain circuits. Creating circuit simulations from  
247 visualized data remains a major challenge and requires extraordinary effort in practice as  
248 amply demonstrated by the Allen Brain Observatory [46]. The need to accelerate the pace  
249 of discovery of the functional logic of the brain of model organisms has entered a center stage  
250 in brain research.

251 FlyBrainLab is uniquely positioned to accelerate the discovery of the functional logic of  
252 the *Drosophila* brain. Its interactive architecture seamlessly integrates and brings together  
253 computational models with neuroanatomical, neurogenetic and electrophysiological data,  
254 organizing neuroscientific fly brain data from a group of seemingly disparate databases,  
255 arrays and tables, into a well structured data and executable circuit repository.

256 As detailed here, the FlyBrainLab UI supports a highly intuitive and automated workflow  
257 that streamlines the 3D exploration and visualization of fly brain circuits, and the interactive  
258 exploration of the functional logic of executable circuits created directly from the explored  
259 and visualized fly brain data. In conjunction with the capability of visually constructing  
260 circuits, speeding up the process of creating interactive executable circuit diagrams can  
261 substantially reduce the exploratory development cycle.

262 The FlyBrainLab Utility and Circuit Libraries accelerate the creation of models of executable  
263 circuits. The Utility Libraries (see also Supplementary Section 2) help untangle the graph  
264 structure of neural circuits from raw connectome and synaptome data. The Circuit Libraries  
265 (see also Supplementary Section 3) facilitate the exploration of neural circuits of the neuropils  
266 of the central complex and, the development and implementation of models of the adult and  
267 larva fruit fly early olfactory system.

268 Importantly, to transcend the limitations of the connectome, FlyBrainLab is providing Cir-  
269 cuit Libraries for molecular transduction in sensory coding (see also Supplementary Section  
270 3), including models of sensory transduction and neuron activity data. These libraries serve  
271 as entry points for discovery of circuit function in the sensory systems of the fruit fly. They  
272 also enable the biological validation of developed executable circuits within the same plat-  
273 form.

274 The modular software architecture underlying FlyBrainLab provides substantial flexibility

275 and scalability for the study of the larva and adult fruit fly brain. As more data becomes  
276 available, we envision that the entire central nervous system of the fruit fly can be readily  
277 explored with FlyBrainLab. Furthermore, the core of the software and the workflow enabled  
278 by the FlyBrainLab for accelerating discovery of *Drosophila* brain functions can be adapted  
279 in the near term to other model organisms including the zebrafish and bee.

## 280 Acknowledgments

281 The research reported here was supported by AFOSR under grant #FA9550-16-1-0410 and  
282 DARPA under contract #HR0011-19-9-0035.

## 283 Author Contributions

284 A.A.L., T.L., M.K.T. and Y.Z. conceived the study and FlyBrainLab software architecture.  
285 T.L. and M.K.T. and Y.Z. developed the FlyBrainLab platform. T.L. and M.K.T. developed  
286 user-side libraries, Y.Z. updated the server-side components of the existing FFBO architec-  
287 ture, M.K.T. developed utility libraries. A.A.L. and Y.Z. developed comparative models of  
288 the central complex. A.A.L., T.L. and M.K.T. developed comparative models of the early  
289 olfactory system. A.A.L., T.L., M.K.T and Y.Z. wrote and revised the manuscript.

## 290 Competing Interests statement

291 The authors declare that they have no competing interests.

## 292 References

- 293 1. Chiang, A.-S. *et al.* Three-dimensional reconstruction of brain-wide wiring networks in  
294 *Drosophila* at single-cell resolution. *Current Biology* **21**, 1–11 (2011).
- 295 2. Berck, M. E. *et al.* The wiring diagram of a glomerular olfactory system. *eLife* **5**. ISSN:  
296 2050-084X. doi:10.7554/elifesciences.14859. [https://elifesciences.org/articles/](https://elifesciences.org/articles/14859)  
297 14859 (May 2016).
- 298 3. Takemura, S.-y. *et al.* A connectome of a learning and memory center in the adult  
299 *Drosophila* brain. *eLife* **6** (2017).
- 300 4. Xu, C. S. *et al.* A connectome of the adult drosophila central brain. *BioRxiv* (2020).
- 301 5. Givon, L. E., Lazar, A. A. & Ukani, N. H. NeuroArch: A Graph dB for Querying and  
302 Executing Fruit Fly Brain Circuits. *Neurokernel Request for Comments* (2015).
- 303 6. Givon, L. E. & Lazar, A. A. Neurokernel: an open source platform for emulating the  
304 fruit fly brain. *PloS one* **11**, e0146581 (2016).

- 305 7. Ukani, N. H. *et al.* The fruit fly brain observatory: from structure to function. *BioRxiv*,  
306 580290 (2019).
- 307 8. Givon, L. E., Lazar, A. A. & Yeh, C.-H. Generating executable models of the Drosophila  
308 central complex. *Frontiers in behavioral neuroscience* **11**, 102 (2017).
- 309 9. Kakaria, K. S. & de Bivort, B. L. Ring attractor dynamics emerge from a spiking model  
310 of the entire protocerebral bridge. *Frontiers in behavioral neuroscience* **11** (2017).
- 311 10. Su, T.-S., Lee, W.-J., Huang, Y.-C., Wang, C.-T. & Lo, C.-C. Coupled symmetric and  
312 asymmetric circuits underlying spatial orientation in fruit flies. *Nature Communications*  
313 **8**, 139 (2017).
- 314 11. Seelig, J. D. & Jayaraman, V. Neural dynamics for landmark orientation and angular  
315 path integration. *Nature* **521**, 186–191 (2015).
- 316 12. Kim, S. S., Rouault, H., Druckmann, S. & Jayaraman, V. Ring attractor dynamics in  
317 the Drosophila central brain. *Science* **356**, 849–853. ISSN: 0036-8075 (2017).
- 318 13. Skaggs, W. E., Knierim, J. J., Kudrimoti, H. S. & McNaughton, B. L. A Model of the  
319 Neural Basis of the Rat's Sense of Direction. *NIPS* (1994).
- 320 14. Lazar, A. A., Liu, T. & Yeh, C. *An Odorant Encoding Machine for Sampling, Recon-*  
321 *struction and Robust Representation of Odorant Identity in ICASSP 2020 - 2020 IEEE*  
322 *International Conference on Acoustics, Speech and Signal Processing (ICASSP)* (2020),  
323 1743–1747.
- 324 15. Kim, A. J., Lazar, A. A. & Slutskiy, Y. B. System identification of Drosophila olfactory  
325 sensory neurons. *Journal of Computational Neuroscience* **30**, 143–161 (2011).
- 326 16. Lazar, A. A. & Yeh, C.-H. *Predictive Coding in the Drosophila Antennal Lobe* 2019.
- 327 17. Hines, M. L. & Carnevale, N. T. The NEURON simulation environment. *Neural com-*  
328 *putation* **9**, 1179–1209 (1997).
- 329 18. Gewaltig, M.-O. & Diesmann, M. Nest (neural simulation tool). *Scholarpedia* **2**, 1430  
330 (2007).
- 331 19. Stimberg, M., Brette, R. & Goodman, D. F. Brian 2, an intuitive and efficient neural  
332 simulator. *eLife* **8** (eds Skinner, F. K., Calabrese, R. L., Skinner, F. K., Zeldenrust, F.  
333 & Gerkin, R. C.) e47314. ISSN: 2050-084X (Aug. 2019).
- 334 20. Bekolay, T. *et al.* Nengo: a Python tool for building large-scale functional brain models.  
335 *Frontiers in neuroinformatics* **7**, 48 (2014).
- 336 21. Sherfey, J. S. *et al.* DynaSim: A MATLAB Toolbox for Neural Modeling and Simulation.  
337 *Frontiers in neuroinformatics* **12**, 10 (2018).
- 338 22. Ray, S. & Bhalla, U. PyMOOSE: interoperable scripting in Python for MOOSE. *Fron-*  
339 *tiers in Neuroinformatics* **2**, 6. ISSN: 1662-5196 (2008).
- 340 23. Akar, N. A. *et al.* Arbor - a morphologically-detailed neural network simulation library  
341 for contemporary high-performance computing architectures. *arXiv preprint arXiv:1901.07454*  
342 (2019).
- 343 24. Sanz Leon, P. *et al.* The Virtual Brain: a simulator of primate brain network dynamics.  
344 *Frontiers in neuroinformatics* **7**, 10 (2013).
- 345 25. Melozzi, F., Woodman, M. M., Jirsa, V. K. & Bernard, C. The Virtual Mouse Brain:  
346 A Computational Neuroinformatics Platform to Study Whole Mouse Brain Dynamics.  
347 *eNeuro* **4**, ENEURO-0111 (2017).
- 348 26. Dai, K. *et al.* Brain Modeling ToolKit: an Open Source Software Suite for Multiscale  
349 Modeling of Brain Circuits. *bioRxiv* (2020).

- 350 27. Dura-Bernal, S. *et al.* NetPyNE, a tool for data-driven multiscale modeling of brain  
351 circuits. *eLife* **8** (eds Bhalla, U. S., Calabrese, R. L., Sterratt, D. & Wójcik, D. K.)  
352 e44494. ISSN: 2050-084X (Apr. 2019).
- 353 28. Davison, A. P. *et al.* PyNN: a common interface for neuronal network simulators. *Frontiers in neuroinformatics* **2**, 11 (2009).
- 354 29. Aleksin, S. G., Zheng, K., Rusakov, D. A. & Savtchenko, L. P. ARACHNE: A neural-  
355 neuroglial network builder with remotely controlled parallel computing. *PLoS compu-*  
356 *tational biology* **13**, e1005467 (2017).
- 357 30. Stockton, D. B. & Santamaria, F. NeuroManager: a workflow analysis based simulation  
358 management engine for computational neuroscience. *Frontiers in neuroinformatics* **9**,  
359 24 (2015).
- 360 31. Crook, S., Gleeson, P., Howell, F., Svitak, J. & Silver, R. A. MorphML: level 1 of the  
361 NeuroML standards for neuronal morphology data and model specification. *Neuroin-*  
362 *formatics* **5**, 96–104 (2007).
- 363 32. Gleeson, P. *et al.* NeuroML: a language for describing data driven models of neurons  
364 and networks with a high degree of biological detail. *PLoS computational biology* **6**,  
365 e1000815 (2010).
- 366 33. Tomkins, A., Ortiz, C. L., Coca, D. & Richmond, P. From GUI to GPU: A toolchain  
367 for GPU code generation for large scale Drosophila simulations using SpineML.
- 368 34. Hines, M. L., Morse, T., Migliore, M., Carnevale, N. T. & Shepherd, G. M. ModelDB:  
369 a database to support computational neuroscience. *Journal of computational neuro-*  
370 *science* **17**, 7–11 (2004).
- 371 35. Eichler, K. *et al.* The complete connectome of a learning and memory centre in an  
372 insect brain. *Nature* **548**, 175–182 (2017).
- 373 36. Milyaev, N. *et al.* The Virtual Fly Brain browser and query interface. *Bioinformatics*  
374 **28**, 411–415 (2011).
- 375 37. Clements, J. *et al.* neuPrint: Analysis Tools for EM Connectomics. *bioRxiv*. doi:10.  
376 1101/2020.01.16.909465. eprint: [https://www.biorxiv.org/content/early/](https://www.biorxiv.org/content/early/2020/01/17/2020.01.16.909465.full.pdf)  
377 [2020/01/17/2020.01.16.909465.full.pdf](https://www.biorxiv.org/content/early/2020/01/17/2020.01.16.909465.full.pdf). [https://www.biorxiv.org/content/](https://www.biorxiv.org/content/early/2020/01/17/2020.01.16.909465)  
378 [early/2020/01/17/2020.01.16.909465](https://www.biorxiv.org/content/early/2020/01/17/2020.01.16.909465) (2020).
- 379 38. Saalfeld, S., Cardona, A., Hartenstein, V. & Tomančák, P. CATMAID: collaborative  
380 annotation toolkit for massive amounts of image data. *Bioinformatics* **25**, 1984–1986.  
381 ISSN: 1367-4803 (Apr. 2009).
- 382 39. Oh, S. W. *et al.* A mesoscale connectome of the mouse brain. *Nature* **508**, 207–214  
383 (2014).
- 384 40. Randler, O. *et al.* Whole-brain activity mapping onto a zebrafish brain atlas. *Nature*  
385 *Methods* **12**, 1039–1046 (2015).
- 386 41. Bates, A. S. *et al.* The natverse, a versatile toolbox for combining and analysing neu-  
387 roanatomical data. *eLife* **9** (ed VijayRaghavan, K.) e53350. ISSN: 2050-084X (Apr.  
388 2020).
- 389 42. Cantarelli, M. *et al.* Geppetto: a reusable modular open platform for exploring neuro-  
390 science data and models. *Philosophical Transactions of the Royal Society B: Biological*  
391 *Sciences* **373**, 20170380 (2018).
- 392 43. Szigeti, B. *et al.* OpenWorm: an open-science approach to modeling *Caenorhabditis*  
393 *elegans*. *Frontiers in computational neuroscience* **8**, 137 (2014).
- 394

- 395 44. Gleeson, P. *et al.* Open Source Brain: a collaborative resource for visualizing, analyzing,  
396 simulating, and developing standardized models of neurons and circuits. *Neuron* **103**,  
397 395–411 (2019).
- 398 45. Einevoll, G. T. *et al.* The Scientific Case for Brain Simulations. *Neuron* **102**, 735–744  
399 (2020/06/20 2019).
- 400 46. De Vries, S. E. J. *et al.* A large-scale standardized physiological survey reveals functional  
401 organization of the mouse visual cortex. *Nature Neuroscience* **23**, 138–151 (2020).
- 402 47. Wolff, T., Iyer, N. A. & Rubin, G. M. Neuroarchitecture and neuroanatomy of the  
403 *Drosophila* central complex: A GAL4-based dissection of protocerebral bridge neurons  
404 and circuits. *Journal of Comparative Neurology* **523**, 997–1037 (2015).
- 405 48. Lin, C.-Y. *et al.* A Comprehensive Wiring Diagram of the Protocerebral Bridge for  
406 Visual Information Processing in the *Drosophila* Brain. *Cell Reports* **3**. [http://dx.  
407 doi.org/10.1016/j.celrep.2013.04.022](http://dx.doi.org/10.1016/j.celrep.2013.04.022), 1739–1753. ISSN: 2211-1247 (May 2013).
- 408 49. Lazar, A. A., Liu, T. & Yeh, C.-H. *An Odorant Encoding Machine for Sampling, Recon-  
409 struction and Robust Representation of Odorant Identity* in ICASSP 2020-2020 IEEE  
410 *International Conference on Acoustics, Speech and Signal Processing (ICASSP)* (2020),  
411 1743–1747.
- 412 50. Münch, D. & Galizia, C. G. DoOR 2.0 - Comprehensive Mapping of *Drosophila melanogaster*  
413 Odorant Responses. *Scientific Reports* **6**, 21841 (Feb. 2016).
- 414 51. Kreher, S. A., Kwon, J. Y. & Carlson, J. R. The molecular basis of odor coding in the  
415 *Drosophila* larva. *Neuron* **46**, 445–456. ISSN: 08966273 (May 2005).

## 416 **Methods**

417 The FlyBrainLab interactive computing platform tightly integrates tools enabling the mor-  
418 phological visualization and exploration of large connectomics/synaptomics datasets, interac-  
419 tive circuit construction and visualization and multi-GPU execution of neural circuit models  
420 for *in silico* experimentation. The tight integration is achieved with a comprehensive open  
421 software architecture and libraries to aid data analysis, creation of executable circuits and  
422 exploration of their functional logic.

423 **Architecture of FlyBrainLab** FlyBrainLab exhibits a highly extensible, modularized ar-  
424 chitecture consisting of a number of interconnected server-side and user-side components (see  
425 Supplementary Figure 1) including the NeuroArch Database, the Neurokernel Execution En-  
426 gine and the NeuroMinerva front-end. The architecture of FlyBrainLab and the associated  
427 components are described in detail in the Supplementary Information Section 1.

428 **FlyBrainLab Utilities Libraries** FlyBrainLab offers a number of utility libraries to un-  
429 tangle the graph structure of neural circuits from raw connectome and synaptome data.  
430 These libraries provide a large number of tools including high level connectivity queries and  
431 analysis, algorithms for discovery of connectivity patterns, circuit visualization in 2D or 3D  
432 and morphometric measurements of neurons. These utility libraries are described in detail  
433 in the Supplementary Information Section 2.

434 **FlyBrainLab Circuit Libraries** FlyBrainLab provides a number of libraries for analysis,  
435 evaluation and comparison of fruit fly brain circuits. The initial release of FlyBrainLab  
436 offers libraries for exploring neuronal circuits of the central complex, early olfactory system,  
437 and implementations of olfactory and visual transduction models. These circuit libraries are  
438 described in detail in the Supplementary Information Section 3.

### 439 **Analyzing, Evaluating and Comparing Circuit Models of the Fruit Fly Central** 440 **Complex**

441 Model A [8], Model B [9] and Model C [10] were implemented using the CXcircuit Library  
442 (see also Supplementary Information Section 3). The circuit diagram of the wild-type fruit  
443 fly provided by the CXcircuit Library underlies model A. It is built by querying all the  
444 neurons of the CX in the FlyCircuit dataset. The innervation pattern of each neuron was  
445 visually examined in the NeuroNLP window and a standard name assigned according to the  
446 naming scheme adopted in the CXcircuit Library. The neurons with missing morphologies in  
447 the FlyCircuit dataset were completed by referencing data available in the literature [47, 48].  
448 Construction of the models B and C were obtained by interactively removing and adding  
449 neurons in the circuit diagram of model A.

450 All three models include the same core subcircuits for modeling the Protocerebral Bridge -  
451 Ellipsoid Body (PB-EB) interaction. The core subcircuits include 3 cell types, namely, the  
452 PB-EB-LAL, PB-EB-NO and EB-LAL-PB neurons (NO - Noduli, LAL - Lateral Accessory  
453 Lobe, see also [8] for a list of synonyms of each neuron class). These cells innervate three  
454 neuropils, either PB, EB and LAL or PB, EB, and NO. Note that only synapses within PB  
455 and EB are considered. For model A, this is achieved by removing all neurons that do not



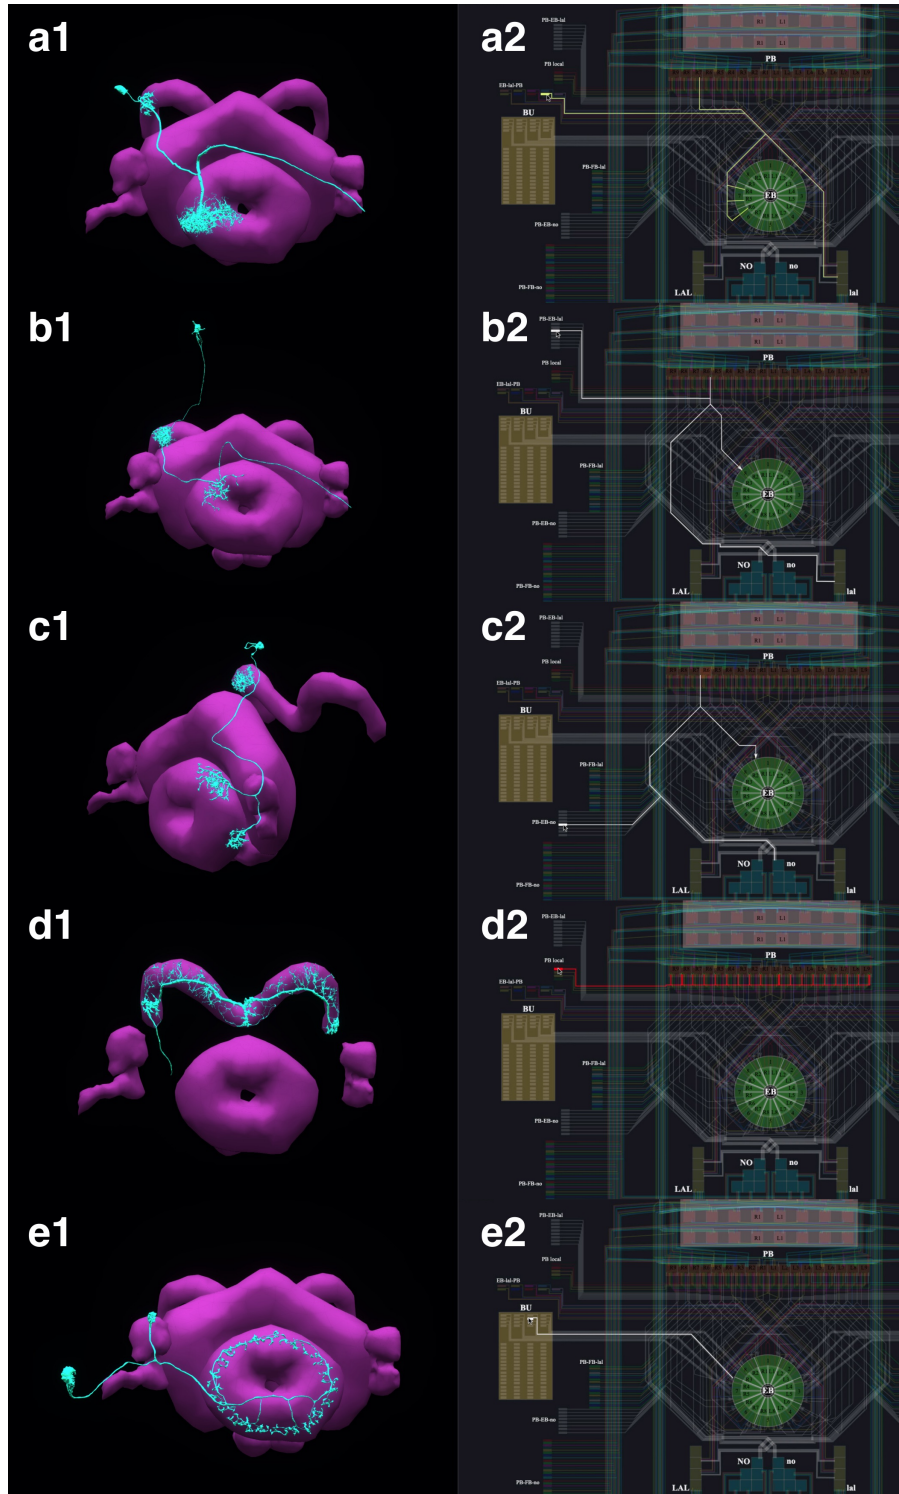

**Figure 5:** The correspondence between the morphology and the circuit diagram representation of 5 classes of neurons that determine the PB-EB interaction. (a1, a2) EB-LAL-PB neuron and its wiring in the circuit diagram. (b1, b2) PB-EB-LAL neuron and its wiring in the circuit diagram. (c1, c2) PB-EB-NO neuron and its wiring in the circuit diagram. (d1, d2) PB local neuron and its wiring in the circuit diagram. (e1, e2) Ring neuron and its wiring in the circuit diagram.

456 belong to the core PB-EB circuit. Model B includes an additional cell type, the PB local  
 457 neurons that introduce global inhibition to the PB-EB circuit. Model C does not include  
 458 PB local neurons, but models 3 types of ring neurons that innervate the EB. Both PB local  
 459 neurons and ring neurons are present in model A. However, except for their receptive fields,  
 460 all ring neurons in model A are the same (see below). Figure 5 depicts the correspondence  
 461 established between the morphology of example neurons and their respective representation  
 462 in the overall circuit diagram.

463 In Model C, the subcircuit consisting of the PB-EB-LAL and EB-LAL-PB neurons was  
 464 claimed to give rise to the persistent bump activity while the interconnect between PB-  
 465 EB-NO and EB-LAL-PB allowed the bump to shift in darkness. To better compare with  
 466 the other two models that did not model the shift in darkness, PB-EB-NO neurons were  
 467 interactively disabled from the diagram.

468 For a single vertical bar presented to the fly at the position shown in Figure 2(d1) (see also  
 469 the flattened visual input in Figure 2(d2)), the PB glomeruli or the EB wedges innervated by  
 470 neurons of each of the 3 circuit models that receive injected current or external spike inputs  
 471 are, respectively, highlighted in Figure 2(a3, b3, c3). The CXcircuit Library generates a set  
 472 of visual stimuli and computes the spike train and/or the injected current inputs to each of  
 473 the 3 models.

474 For model A [8], each PB glomerulus is endowed with a rectangular receptive field that covers  
 475  $20^\circ$  in azimuth and the entire elevation. Together, the receptive fields of all PB glomeruli  
 476 tile the  $360^\circ$  azimuth. All PB neurons with dendrites in a glomerulus, including the PB-  
 477 EB-LAL and PB-EB-NO neurons, receive the visual stimulus filtered by the receptive field  
 478 as an injected current. Additionally, each Bulb (BU) microglomerulus is endowed with a  
 479 Gaussian receptive field with a standard deviation of  $9^\circ$  in both azimuth and elevation.  
 480 The ring neuron innervating a microglomerulus receives the filtered visual stimulus as an  
 481 injected current (see also the arrows in Figure 2(a3)). Neuron dynamics follow the Leaky  
 482 Integrate-and-Fire (LIF) neuron model

$$C^i \frac{dV^i}{dt} = -\frac{V^i - V_0^i}{R^i} + I^i, \quad (1)$$

483 where  $V^i$  is the membrane voltage of the  $i$ th neuron,  $C^i$  is the membrane capacitance,  $V_0^i$  is  
 484 the resting potential,  $R^i$  is the resistance, and  $I^i$  is the synaptic current. Upon reaching the  
 485 threshold voltage  $V_{th}^i$ , each neuron's membrane voltage is reset to  $V_r^i$ . Synapses are modeled  
 486 as  $\alpha$ -synapses with dynamics given by the differential equations

$$\begin{aligned} g^i(t) &= \bar{g}^i s^i(t) \\ \frac{ds^i}{dt}(t) &= h^i(t) 1_{[t \geq 0]}(t) \\ \frac{dh^i}{dt}(t) &= -(a_r^i + a_d^i)h(t) - a_r^i a_d^i s^i + a_r^i a_d^i \sum_k \delta(t - t_k^i), \end{aligned} \quad (2)$$

487 where  $\bar{g}^i$  is a scaling factor,  $a_r^i$  and  $a_d^i$  are, respectively, the rise and decay time of the synapse,  
 488  $1_{[t \geq 0]}(t)$  is the Heaviside function and  $\delta(t)$  is the Dirac function.  $\delta(t - t_k^i)$  indicates an input  
 489 spike to the  $i$ th synapse at time  $t_k^i$ .

490 For Model B [9], the receptive field of each of the 16 EB wedges covers  $22.5^\circ$  in azimuth. All  
491 EB-LAL-PB neurons that innervate a wedge receive a spike train input whose rate is propor-  
492 tional to the filtered visual stimulus (see also arrow in Figure 2(b3)). The maximum input  
493 spike rate is 120 Hz when the visual stimulus is a bar of width  $20^\circ$  at maximum brightness  
494 1. A 5 Hz background firing is always added even in darkness. Neurons are modeled as LIF  
495 with a refractory period of 2.2 ms as suggested in [9]. For synapses, instead of using the  
496 postsynaptic current (PSC)-based model described in [9], we used the  $\alpha$ -synapse described  
497 above and chose the parameters such that the time-to-peak and peak value approximately  
498 matched that of the PSC-based synapse.

499 For Model C [10], the receptive field of each of the 16 EB wedges covers  $22.5^\circ$  in azimuth.  
500 Two PB-EB-LAL neurons project to a wedge each from a different PB glomerulus. Input to  
501 the Model C circuit is presented to pairs of PB glomeruli (see also arrows in Figure 2(c3)),  
502 and all neurons with dendrites in these two PB glomeruli receive a spike train input at a  
503 rate proportional to the filtered visual stimuli, with a maximum 50 Hz when the bar is at  
504 maximum brightness 1. Neurons are modeled as LIF neurons with a refractory period of  
505 2 ms (as suggested in [10]). Synapses are either modeled by the AMPA/GABA<sub>A</sub> receptor  
506 dynamics as

$$\begin{aligned} g^i(t) &= \bar{g}^i s^i(t) \\ \frac{ds^i}{dt}(t) &= -\frac{s^i(t)}{\tau^i} + \sum_k \delta(t - t_k^i), \end{aligned} \quad (3)$$

507 where  $g^i(t)$  is the synaptic conductance,  $\tau^i$  is the time constant, and  $s^i(t)$  is the state variable  
508 of the  $i$ th synapse, or modeled by the NMDA receptor dynamics [10]

$$\begin{aligned} g^i(t) &= \frac{\bar{g}^i s^i(t)}{1 + [Mg^{2+}]^i e^{-\frac{0.062V}{3.56}}} \\ \frac{ds^i}{dt}(t) &= -\frac{s^i(t)}{\tau^i} + \alpha^i (1 - s^i(t)) \sum_k \delta(t - t_k^i), \end{aligned} \quad (4)$$

509 where  $g^i(t)$  is the synaptic conductance,  $\bar{g}^i$  is the maximum conductance,  $s^i(t)$  is the state  
510 variable,  $\tau^i$  is the time constant,  $\alpha^i > 0$  is a constant,  $[Mg^{2+}]^i$  is the extracellular con-  
511 centration of  $Mg^{2+}$ , respectively, of the  $i$ th synapse and  $V$  is the membrane voltage of the  
512 postsynaptic neuron.

513 Parameters of the above models can be found in [8–10] and in the CXcircuit Library.

514 The 35-second visual stimulus, depicted in Figure 2(d3), was presented to all 3 models. A  
515 bright vertical bar moves back and forth across the entire visual field while a second bar  
516 with lower brightness is presented at a fixed position. Figure 2(d3, bottom) depicts the time  
517 evolution of the visual input.

518 To visualize the response of the 3 executable circuits, the mean firing rate  $r^j(t)$  of all EB-  
519 LAL-PB neurons that innervate the  $j$ th EB wedge was calculated following [10]

$$r^j(t) = \frac{1}{N^j} \sum_{i \in \mathbb{I}^j} \left( \sum_k \delta(t - t_k^i) * e^{-\frac{t}{0.7215}} \right), \quad (5)$$

520 where  $*$  denotes the convolution operator,  $\mathbb{I}^j$  is the index set of EB-LAL-PB neurons that  
521 innervate the  $j$ th EB wedge, whose cardinality is  $N^j$ , and  $t_k^i$  is the time of  $k$ th spike generated  
522 by  $i$ th neuron. CXcircuit Library provides utilities to visualize the circuit response.

523 **Analyzing, Evaluating and Comparing of Adult Antenna and Antennal Lobe**  
524 **Circuit Models Based upon the FlyCircuit and Hemibrain Datasets** The Early  
525 Olfactory System models based on the FlyCircuit and the Hemibrain datasets were im-  
526 plemented using the EOScircuits Library (see also Supplementary Information Section 3).  
527 The circuit architecture, shown in Figure 3(b, left), follows previous work [49] based upon  
528 the anatomically observed connectivity between local neurons (LN) and projection neurons  
529 (PNs) (see also Figure 3(a, left)). At the input layer (the Antenna Circuit), the stimulus  
530 model for the adult EOS circuit builds upon affinity data from the DoOR dataset [50], with  
531 physiological recordings for 23/51 receptor types. Receptors for which there was no affinity  
532 data in the DoOR dataset were assumed to have zero affinity values. Two input stimuli  
533 were used. The first input stimulus is 5-second long, and between 1-3 second, ammonium  
534 hydroxide with a constant concentration of 100 ppm was presented to the circuits in Figure  
535 3(b) and the responses are shown in (Figure 3(c)). The same odorant waveform is used  
536 here as in Figure 3(d). To generate the concentration waveform of the odorant, values were  
537 drawn randomly from the uniform distribution between 0 and 100 ppm every  $10^{-4}$  seconds  
538 between 1-3 seconds in Figure 3(d). The sequence is then filtered by a lowpass filter with a  
539 30Hz bandwidth [15] to obtain the concentration of the odorant.

540 Olfactory Sensory Neurons expressing each one receptor type processed the input odorant in  
541 parallel. The Antennal Lobe model based on FlyCircuit data is divided into two sub-circuits:  
542 1) the ON-OFF circuit and 2) the Predictive Coding circuit [16]. The ON-OFF circuit  
543 describes odorant gradient encoding by Post-synaptic LNs in the AL, while the Predictive  
544 Coding circuit describes a divisive normalization mechanism by Pre-synaptic LNs that enable  
545 concentration-invariant odorant identity encoding by Projection Neurons in the AL.

546 The EOS model based on Hemibrain dataset takes advantage of the detailed connectivity be-  
547 tween neurons (see Figure 3(a, right) and introduces a more extensive connectome-synaptome  
548 model of the AL (see Figure 3(b, right)). FlyBrainLab utility libraries were used to 1) access  
549 the Hemibrain data, 2) find PNs and group them by glomeruli, 3) use this data to find the  
550 OSNs associated with each glomerulus, 4) find LNs and group connectivity between OSNs,  
551 LNs and PNs. We constructed in FlyBrainLab an executable circuit using the Hemibrain  
552 data. In addition to the baseline model in Figure 3(b, left), we introduced 1) LNs that inner-  
553 vate specific subsets of glomeruli, 2) LNs that provide inputs to both OSN axon terminals  
554 and to PNs dendrites, 3) synapses from PNs onto LNs.

555 **Evaluating, Analyzing and Comparing Early Olfactory Circuit Models of the**  
556 **Larva and the Adult Fruit Flies**

557 The Early Olfactory System models for both the adult and the larval flies were implemented  
558 using the EOScircuits library (see also Supplementary Information Section 3). The circuit of  
559 the adult EOS follows the one described above. Similarly, the larval model is implemented  
560 using physiological recording on 14/21 receptor types [51]. In both the adult and larval  
561 physiology datasets, 13 common mono-molecular odorants were employed (see Figure 4(d)

562 legend). Together, 13/23 odorant/receptor pairs for adult and 13/14 odorant/receptor pairs  
563 for larva were used for model evaluation, where each odorant was carried by a 100 ppm con-  
564 centration waveform. In both adult and larva Antenna circuits, Olfactory Sensory Neurons  
565 expressing each receptor type processed an odorant waveform in parallel.

566 The adult Antennal Lobe model follows the one built on the Hemibrain data [4]. Both the  
567 adult and the larva circuit components are parameterized by the number of LNs per type,  
568 where for instance there were 28 LNs used in the larval model in accordance to connectome  
569 data [2]. In addition to neuron types, the AL circuit was modified in terms of connectivity  
570 from 1) LNs to Projection Neurons (PNs), 2) PNs to LNs and 3) LNs to LNs. The evaluation  
571 of both EOS models focused on the Input/Output relationship comparison between the adult  
572 and the larval EOS models. For each of the 13 odorants, the input stimulus is a 5 second  
573 concentration waveform that is 100ppm from 1-4 second and 0 ppm otherwise. Both adult  
574 and larval models reach steady-state after 500ms and the steady-state population responses  
575 averaged across 3-4 seconds are computed as odorant combinatorial code at each layer (i.e.,  
576 OSN response, PN response).

577 **Code Availability and Installation** Stable and tested FlyBrainLab installation instruc-  
578 tions for user-side components and utility libraries are available at [https://github.com/](https://github.com/FlyBrainLab/FlyBrainLab)  
579 [FlyBrainLab/FlyBrainLab](https://github.com/FlyBrainLab/FlyBrainLab) for Linux, MacOS and Windows. The installation and use of  
580 FlyBrainLab does not require a GPU, but a service-side backend must be running, for  
581 example, on a cloud service, that the user-side of FlyBrainLab can connect to. The server-  
582 side backend codebase is publicly available at <https://github.com/fruiflybrain> and  
583 <https://github.com/neurokernel>.

584 A full installation of FlyBrainLab, including all backend and frontend components, is avail-  
585 able as a Docker image at <https://hub.docker.com/r/fruiflybrain/fbl>. The image  
586 requires a Linux host with at least 1 CUDA-enabled GPU and the nvidia-docker pack-  
587 age (<https://github.com/NVIDIA/nvidia-docker>) installed. For a custom installation  
588 of the complete FlyBrainLab platform, a shell script is available at [https://github.com/](https://github.com/FlyBrainLab/FlyBrainLab)  
589 [FlyBrainLab/FlyBrainLab](https://github.com/FlyBrainLab/FlyBrainLab).

590 **Data Availability** The NeuroArch Database created from publicly available FlyCircuit,  
591 Hemibrain and Larva L1EM datasets can be downloaded from [https://hub.docker.com/](https://hub.docker.com/r/fruiflybrain/fbl)  
592 [r/fruiflybrain/fbl](https://hub.docker.com/r/fruiflybrain/fbl).

## 593 Supplementary Information

### 594 1 The Architecture of FlyBrainLab

595 To support the study of the function of brain circuits FlyBrainLab implements an extensible,  
596 modularized architecture that tightly integrates fruit fly brain data and models of executable  
597 circuits. Supplementary Figure 1 depicts the architecture of FlyBrainLab on both the user-  
598 and backend server-side.

599 The backend server-side components are described in section 1.1. The user interface and  
600 user-side components are presented in section 1.2.

#### 601 1.1 The Server-Side Components

602 The server-side backend consists of 4 components: FFBO Processor, NeuroArch, Neurokernel  
603 and NeuroNLP servers. They are collectively called the FFBO servers. A brief description  
604 of each of the components is given below.

605 **FFBO Processor** implements a `Crossbar.io` router (<https://crossbar.io/>) that estab-  
606 lishes the communication path among connected components. Components communicate  
607 using routed Remote Procedure Calls (RPCs) and a publish/subscribe mechanism. The  
608 routed RPCs enable functions implemented on the server-side to be called by the user-side  
609 backend (see also Section 1.2). After an event occurs, the publisher immediately informs  
610 topic subscribers by invoking the publish/subscribe mechanism. This enables, for example,  
611 the FFBO processor to inform the user-side and other servers when a new backend server  
612 is connected. The FFBO processor can be hosted locally or in the cloud. It can also be  
613 hosted by a service provider for, *e.g.*, extra data sharing. The open source code of the FFBO  
614 processors is available at <https://github.com/fruitflybrain/ffbo.processor>.

615 **NeuroArch Server** hosts the NeuroArch graph database [1] implemented with OrientDB  
616 (<https://orientdb.com>). The NeuroArch Database provides a novel data model for repre-  
617 sentation and storage of connectomic, synaptomic, cell type, activity and genetic data of the  
618 fruit fly brain with cross-referenced executable circuits. The NeuroArch data model is the  
619 foundation of the integration of fruit fly brain data and executable circuits in FlyBrainLab.  
620 Low-level queries of the NeuroArch Database are supported by the NeuroArch Python API  
621 (<https://github.com/fruitflybrain/neuroarch>). The NeuroArch Server provides high  
622 level RPC APIs for remote access of the NeuroArch Database. The open source code of the  
623 NeuroArch Server is available at [https://github.com/fruitflybrain/ffbo.neuroarch\\_](https://github.com/fruitflybrain/ffbo.neuroarch_)  
624 **component**.

625 **Neurokernel Server** provides RPC APIs for code execution of model circuits by the Neu-  
626 rokernel Execution Engine [2]. Neurokernel supports the easy combination of independently  
627 developed executable circuits towards the realization of a complete whole brain emulation.  
628 The Neurokernel Execution Engine features:

- 629 • the core Neurokernel services (<https://github.com/neurokernel/neurokernel>) provid-  
630 ing management capabilities for code execution, and communication between inter-  
631 connected circuits,
- 632 • the Neurodriver services (<https://github.com/neurokernel/neurodriver>) provid-  
633 ing low level APIs for code execution on GPUs according to user-specified circuit  
634 connectivity, biological spike generators and synapses, and input stimuli.

635 The Neurokernel Server directly fetches the specification of executable circuits from the  
636 NeuroArch Server, instantiates these circuits and transfers them for execution to the Neu-  
637 rokernel Execution Engine. The open source code of the Neurokernel Server is available at  
638 [https://github.com/fruitflybrain/ffbo.neurokernel\\_component](https://github.com/fruitflybrain/ffbo.neurokernel_component).

639 **NeuroNLP Server** provides an RPC API for translating queries written as English sen-  
640 tences, such as "add dopaminergic neurons innervating the mushroom body", into database  
641 queries that can be interpreted by the NeuroArch Server API. This capability increases the  
642 accessibility of the NeuroArch Database to researchers without prior exposure to database  
643 programming, and facilitates research by simplifying the often-demanding task of writing  
644 database queries. The open source code of the NeuroNLP Server is available at [https://github.com/fruitflybrain/ffbo.nlp\\_component](https://github.com/fruitflybrain/ffbo.nlp_component).  
645

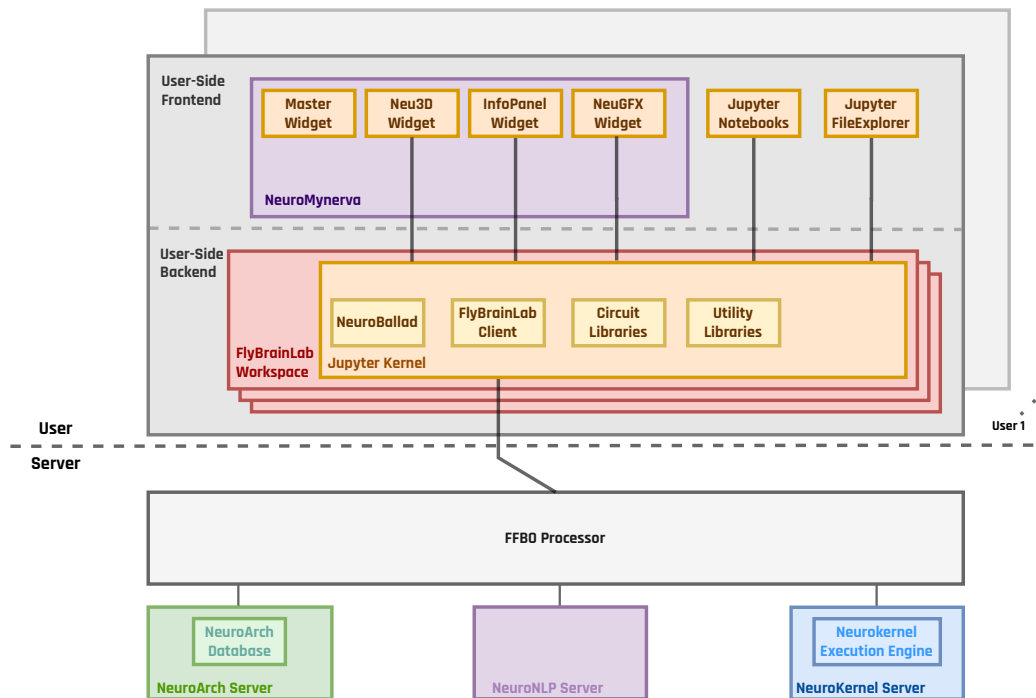

**Supplementary Figure 1:** The Architecture of FlyBrainLab. The server-side architecture [3] consists of the FFBO Processor, the NeuroNLP Server, the NeuroArch Server and the Neurokernel Server. The user-side provides the local execution environment as well as an easy-to-use GUI for multi-user access to the services provided by the server-side. The FlyBrainLab Utility Libraries and Circuit Libraries (see Section 2 and 3 for details) can be loaded into the FlyBrainLab workspace of the user-side backend.

## 646 1.2 The User Interface and User-Side Components

647 The FlyBrainLab user-side consists of the NeuroMynerva frontend and the FlyBrainLab  
648 Client and Neuroballad backend components. A brief description of each of the components  
649 is given below.

650 **NeuroMynerva** is the user-side frontend of FlyBrainLab. It is a browser-based application  
651 that substantially extends upon JupyterLab by providing a number of widgets, including  
652 a Neu3D widget for 3D visualization of fly brain data, a NeuGFX widget for exploring  
653 executable neural circuits with interactive circuit diagrams, and an InfoPanel widget for  
654 accessing individual neuron/synapse data. All widgets communicate with and retrieve data  
655 from the FlyBrainLab Client. A master widget keeps track of the instantiated widgets by  
656 the user interface. With the JupyterLab native notebook support, APIs of the FlyBrainLab  
657 Client can be directly called from notebooks. Such calls provide Python access to NeuroArch  
658 queries and circuit execution. Interaction between code running in notebooks and widgets  
659 is fully supported.

660 **FlyBrainLab Client** is a user-side backend implemented in Python that connects to the  
661 FFBO processor and accesses services provided by the connected backend servers. Fly-  
662 BrainLab Client provides program execution APIs for handling requests to the server-side  
663 components and parsing of data coming from backend servers. The FlyBrainLab Client also  
664 exhibits a number of high-level APIs for processing data collected from the backend servers,  
665 such as computing the adjacency matrix from retrieved connectivity data or retrieving mor-  
666 phometrics data. In addition, it handles the communication with the frontend through the  
667 Jupyter kernel.

668 **NeuroBallad** is a Python library that simplifies and accelerates executable circuit construc-  
669 tion and simulation using Neurokernel in Jupyter notebooks in FlyBrainLab. NeuroBallad  
670 provides classes for specification of neuron or synapse models with a single line of code and  
671 contains functions for adding and connecting these circuit components with one another.  
672 NeuroBallad also provides capabilities for compactly specifying inputs to a circuit on a per-  
673 experiment basis.

674 **NeuroMynerva User Interface (UI)** is depicted in the Supplementary Figure 2. The  
675 UI typically consists 5 blocks, including (1) a NeuroNLP 3D visualization window with a  
676 search bar for NLP queries, displaying and interacting with fly brain data such as the mor-  
677 phology of neurons and position of synapses, that are all managed by the Neu3D widget;  
678 (2) a NeuroGFX executable circuits window, for exploring executable neural circuits with  
679 interactive circuit diagrams, that are managed by the NeuGFX widget; (3) a Program Exe-  
680 cution window with a built-in Jupyter notebook, executing any Python code including calls  
681 to the FlyBrainLab Client, for direct access to database queries, visualization, and circuit  
682 execution, (4) an Info Panel displaying details of highlighted neurons including the origin of  
683 data, genetic information, morphometric statistics and synaptic partners, etc, all managed  
684 by the InfoPanel widget; (5) a Local File Access Panel with a built-in Jupyter file browser  
685 for accessing local files.



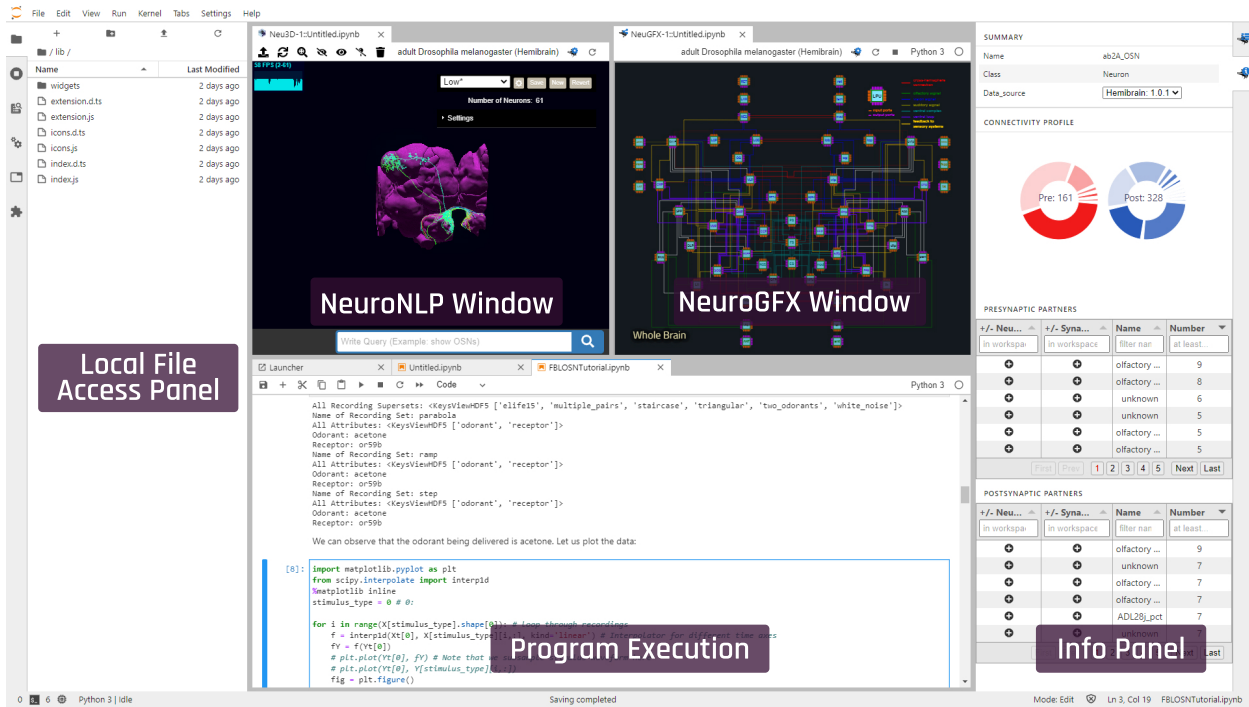

**Supplementary Figure 2:** The NeuroMynerva User Interface. (top left) NeuroNLP 3D visualization window. (top right) NeuroGFX executable circuits window. (bottom center) Program Execution window with Jupyter notebook. (right) Information Panel for individual neurons/synapses. (left) Local File Access Panel with Jupyter FileBrowser widget.

## 2 Utility Libraries for the Fruit Fly Connectome/ Synaptome

Different connectome and synaptome datasets are often available at different levels of abstraction. For example, some datasets come with cell types labeled and some only provide raw graph level connectivity. Without extensive analysis tools, it takes substantial manual effort to construct and test a neural circuit. FlyBrainLab offers a number of utilities to explicate the graph structure of neural circuits from raw connectome and synaptome data. In conjunction with the capability of visually constructing circuits enabled by the NeuroMynerva front-end, speeding up the process of creating interactive executable circuit diagrams can substantially reduce the exploratory development cycle.

The FlyBrainLab Utility Libraries include:

- **NeuroEmbed:** Cell Classification and Cell Type Discovery,
- **NeuroSynapsis:** High Level Queries and Analysis of Connectomic and Synaptomic Data,
- **NeuroGraph:** Connectivity Pattern Discovery and Circuit Visualization Algorithms,
- **NeuroWatch:** 3D Fruit Fly Data Visualization in Jupyter Notebooks,

- 702 • **NeuroMetry:** Morphometric Measurements of Neurons.

703 In this section, we outline the capabilities enabled by the Utility Libraries listed above.

#### 704 **NeuroEmbed: Cell Classification and Cell Type Discovery**

705 The NeuroEmbed library implements a set of algorithms for structure discovery based on  
706 graph embeddings into low-dimensional spaces providing capabilities for:

- 707 • Cell type classification based on connectivity, and optionally morphometric features,
- 708 • Searching for neurons that display a similar connectivity pattern,
- 709 • Standard evaluation functions for comparison of embedding algorithms on clustering  
710 and classification tasks.

#### 711 **NeuroSynapsis: High Level Queries and Analysis of Connectomic and Synap- 712 tomic Data**

713 The NeuroSynapsis Library offers a large set of utilities to accelerate the construction of  
714 circuits and analysis of connectomic and synaptomic data. It provides capabilities for

- 715 • Retrieval of neuron groups according to user-defined criteria, such as cell type, inner-  
716 vation pattern and connectivity, etc.,
- 717 • Retrieval of connectivity between neurons, cell types, or user-defined neuron groups,  
718 thought direct or indirect connections,
- 719 • Retrieval of synapse positions and partners for groups of neurons and the capability  
720 to filter synapses by brain region, partnership or spatial location,
- 721 • Statistical analysis of retrieved synapses, such as the synaptic density in a brain region,

#### 722 **NeuroGraph: Connectivity Pattern Discovery and Circuit Visualization Algo- 723 rithms**

724 The NeuroGraph Library offers a set of tools to discover and analyze any connectivity pattern  
725 among cell groups within a circuit. Capabilities include:

- 726 • Discovery of connectivity patterns between cell populations by automatic generation  
727 of connectivity dendrograms with different linkage criteria (such as Ward or average)  
728 [4, 5],
- 729 • Analysis of the structure of circuits by community detection algorithms such as Lou-  
730 vain, Leiden, Label Propagation, Girvan-Newman and Infomap,
- 731 • Analysis of neural circuit controllability, for example discovery of driver nodes [6],
- 732 • Comparing observed connectivity between groups of cells with models of random con-  
733 nectivity.

734 In addition, the NeuroGraph Library provides utilities to visualize the connectivity of a  
735 neural circuit to aid the creation of interactive circuit diagrams. Further capabilities in-  
736 clude

- 737 • Force-directed layout for the architecture-level graph of the whole brain or circuit-level  
738 graph of circuits specified by NeuroSynapsis,
- 739 • Semi-automated generation of 2D circuit diagrams from specified connectome datasets  
740 either at single-neuron or cell-type scale by separating circuit components into input,  
741 local and output populations for layouting.

## 742 **NeuroWatch: 3D Fruit Fly Data Visualization in Jupyter Notebooks**

743 The NeuroWatch Library offers utilities to enable visualization of neuron morphology data  
744 using Neu3D in Jupyter Notebook cells. Capabilities include:

- 745 • Loading brain regions in 3D mesh format,
- 746 • Recoloring, rescaling, repositioning and rotating neuropils, neurons and synapses for  
747 visualization,
- 748 • Interactive alignment of new neuromorphology datasets into FlyBrainLab widgets.

## 749 **NeuroMetry: Morphometric Measurements of Neurons**

750 Morphometric measurements of neurons can be extracted from neuron skeleton data available  
751 in connectome datasets in `.swc` format. NeuroMetry provides utilities for

- 752 • Calculating morphometric measurements of neurons that are compatible with Neuro-  
753 Mopho.org [7], such as total length, total surface area, total volume, maximum eu-  
754 clidean distance between two points, width, height, depth, average diameter, number  
755 of bifurcations and the maximum path distance,
- 756 • Accessing precomputed measurements in currently available datasets in FlyBrainLab,  
757 including FlyCircuit and Hemibrain data.

758 An application of the morphometric measurements is the estimation of energy consumption  
759 arising from spike generation in axon-hillocks [8].

## 760 **Examples**

761 In Supplementary Figure 3, we briefly present a few examples that illustrate some of the  
762 capabilities of the FlyBrainLab Utility Libraries.

763 In Supplementary Figure 3(a), we used the NeuroGraph library to analyze the connectivity  
764 of neurons in the Hemibrain dataset to identify groups of neurons that internally form dense  
765 connections. Here, the Louvain algorithm extracted 8 densely connected neuron groups  
766 that correspond to known neuropils and brain regions including the antennal lobe (AL),  
767 the mushroom body (MB), the lateral horn (LH), the central complex (CX), the anterior  
768 ventrolateral protocerebrum (AVLP) and the superior protocerebrum (SP). The other two  
769 correspond to the anterior optic tubercle combined with neurons in the posterior brain  
770 (AOTUP) and neurons in the anterior central brain (ACB). A diagram of the connections  
771 between these groups of neurons is depicted in Supplementary Figure 3(b).

772 In Supplementary Figure 3(c), neurons innervating the VA1v glomerulus of the antennal  
773 lobe (from the VA1v connectome dataset [10]) is visualized with NeuroWatch. To untangle

774 the graph structure of this circuit, we applied the Adjacency Spectral Embedding algorithm  
 775 [11] of the NeuroGraph library (see Supplementary Figure 3(d)). The results obtained show  
 776 that the algorithm is able to correctly separate ipsilateral OSNs, contralateral OSNs, local  
 777 neurons and projection neurons without an explicit knowledge of the existence of these cell  
 778 types (clusters marked manually). Looking into outliers that lie far away from their clusters  
 779 may guide future research inquiries into cell types.

780 In Supplementary Figure 3(f), we generated a circuit diagram using NeuroGraph and de-  
 781 picted a lateral horn subcircuit downstream of the V glomerulus projection neurons as well  
 782 as the neuropils that the lateral horn output neurons (LHONs) project to [12]. The corre-  
 783 sponding neuronal circuit is depicted in Supplementary Figure 3(e).

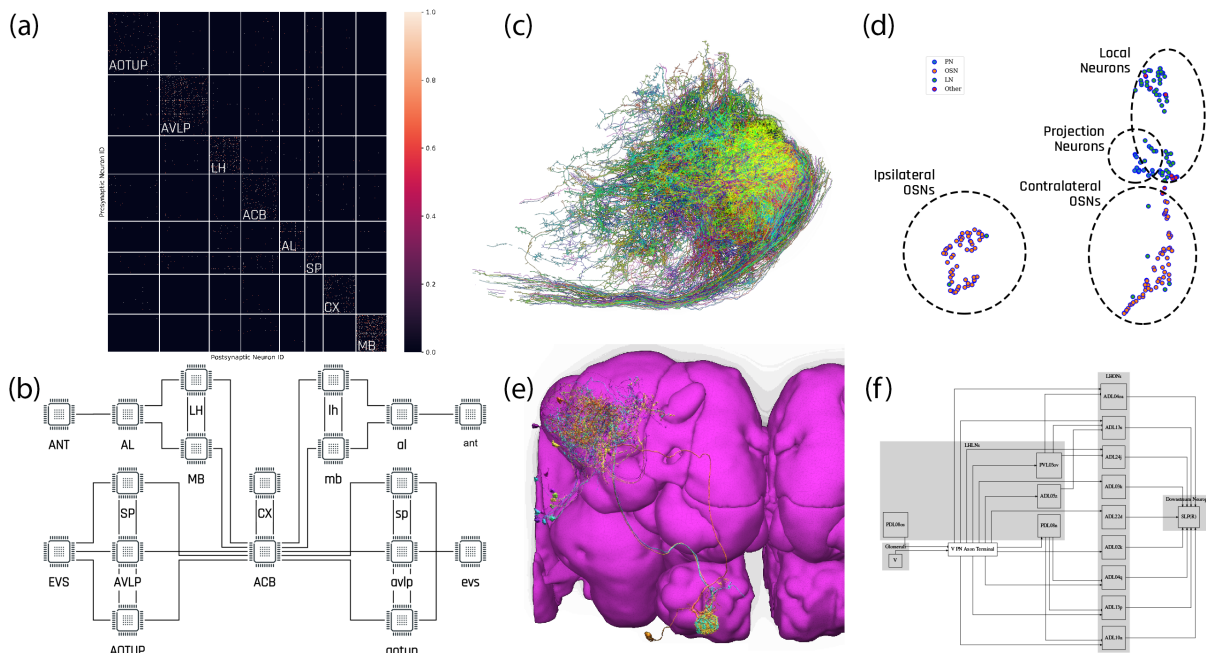

**Supplementary Figure 3:** Examples of circuit-level analyses enabled by the FlyBrain-Lab Utility Libraries. **(a)** Louvain algorithm applied to the Hemibrain dataset [9] showing eight groups of densely connected neurons using NeuroGraph. **(b)** A circuit diagram of the *Drosophila* brain drawn using the inter-group edge information for the data in (a). Visual and olfactory inputs from, respectively, the early visual system (EVS) and antenna (ANT) are added. Groups in the left hemisphere added by symmetry. **(c)** VA1v connectomics dataset shown in a Neurowatch window [10]. **(d)** Adjacency Spectral Embedding applied to the VA1v connectomics dataset using the NeuroGraph library shows segregation between local neurons and projection neurons, and suggests connectivity motifs for PNs. **(e)** Uniglomerular projection neurons with dendrites in the V glomerulus and downstream lateral horn neurons visualized with NeuroNLP. **(f)** Circuit diagram automatically generated by the circuit visualization utilities of NeuroGraph starting with the circuit in (e). The diagram shows the circuit downstream of the V glomerulus projection neuron in the lateral horn, and further down to the neuropils that the lateral horn output neurons (LHONs) project to.

## 3 Libraries for Analyzing, Evaluating and Comparing Fruit Fly Brain Circuits

The FlyBrainLab Circuit Library includes:

- **CXcircuits**: Library for Central Complex Circuits,
- **EOScircuits**: Library for Larva and Adult Early Olfactory Circuits,
- **MolTrans**: Library for Molecular Transduction in Sensory Encoding.

These are respectively described in sections 3.1, 3.2 and 3.3 below.

### 3.1 CXcircuits: Library for Central Complex Circuits

The CXcircuits library facilitates the exploration of neural circuits of the central complex (CX) based on the FlyCircuit dataset [13]. It supports the evaluation and direct comparison of the state-of-the-art of executable circuit models of the CX available in the literature, and accelerates the development of new executable CX circuit models that can be evaluated and scrutinized by the research community at large in terms of modeling assumptions and biological validity. It can be easily expanded to account for the Hemibrain dataset [9].

The main capabilities of the CX Library include programs for:

- constructing *biological* CX circuits featuring
  - a naming scheme for CX neurons that is machine parsable and facilitates the extraction of innervation patterns [14],
  - algorithms for querying CX neurons in the NeuroArch database, by neuron type, by subregions they innervate, and by connectivity,
  - an inference algorithm for identifying synaptic connections between CX neurons in NeuroArch according to their innervation patterns,
- constructing *executable* CX circuit diagrams that
  - are interactive for CX circuits in wild-type fruit flies,
  - interactively visualize neuron innervation patterns and circuit connectivity,
  - are interoperable with 3D visualizations of the morphology of CX neurons,
  - easily reconfigure CX circuits by enabling/disabling neurons/synapses, by enabling/disabling subregions in any of the CX neuropils, and by adding neurons,
  - readily load neuron/synapse models and parameters,
- evaluation of the executable CX circuits with
  - a common set of input stimuli, and the

815 – visualization of the execution results with a set of plotting utilities for generating  
816 raster plots and a set of animation utilities for creating videos.

## 817 **3.2 EOScircuits Library for Larva and Adult Early Olfactory Cir-** 818 **cuits**

819 The EOScircuits Library accelerates the development of models of the fruit fly early olfactory  
820 system (EOS), and facilitates structural and functional comparisons of olfactory circuits  
821 across developmental stages from larva to the adult fruit fly. Built upon FlyBrainLab’s robust  
822 execution backend, the EOScircuits Library enables rapid iterative model development and  
823 comparison for Antenna (ANT), Antennal Lobe (AL) and Mushroom Body (MB) circuits  
824 across developmental stages.

825 **ANTcircuits** Modeled after the first layer of the olfactory pathway, the ANTCircuits Library  
826 builds upon the Olfactory Transduction (OlfTrans) library (see Section 3.3 below) and de-  
827 scribes interactions between odorant molecules and Olfactory Sensory Neurons (OSNs).

828 The library provides parameterized ANT circuits, that support manipulations including

- 829 • Changing the affinity values of each of the odorant-receptor pairs characterizing the  
830 input of the Odorant Transduction Process [15],
- 831 • Changing parameter values of the Biological Spike Generators (BSGs) associated with  
832 each OSN [15],
- 833 • Changing the number of OSNs expressing the same Odorant Receptor (OR) type.

834 **ALcircuits** Modeled after the second layer of the olfactory pathway, the ALcircuits Li-  
835 brary describes the interaction between OSNs in ANT, Projection Neurons in AL and Local  
836 Neurons in AL.

837 The library provides parameterized AL circuits, that support manipulations including

- 838 • Changing parameter values of Biological Spike Generators (BSGs) associated with each  
839 of the Local and Projection Neurons,
- 840 • Changing the number and connectivity of Projection Neurons innervating a given AL  
841 Glomerulus,
- 842 • Changing the number and connectivity of Local Neurons in the Predictive Coding and  
843 ON-OFF circuits of the AL [16].

844 **MBcircuits** Modeled after the third neuropil of the olfactory pathway, the MBcircuits  
845 Library describes the expansion-and-sparsification circuit consisting of a population of An-  
846 tennal Lobe Projection Neurons and Mushroom Body Kenyon Cells (KCs) [17].

847 The library provides a parameterized the MB subcircuit involving Kenyon Cells and the  
848 Anterior Posterior Lateral (APL) neuron, and supports circuit manipulations including

- 849 • Generating and changing random connectivity patterns between PNs and KCs with  
850 varying degree of fan-in ratio (number of PNs connected to a given KC),
- 851 • Changing the strength of feedback inhibition of the APL neuron.

### 852 **3.3 MolTrans Library for Molecular Transduction in Sensory En-** 853 **coding**

854 The Molecular Transduction Library accelerates the development of models of early sensory  
855 systems of the fruit fly brain by providing 1) implementations of transduction on the molec-  
856 ular level that accurately capture the encoding of inputs at the sensory periphery, and 2)  
857 activity data of the sensory neurons such as electrophysiology recordings for the validation  
858 of executable transduction models.

859 **The MolTrans Library** includes the following packages:

- 860 • **Olfactory Transduction (OlfTrans):** Molecular Transduction in Olfactory Sensory  
861 Neurons,
- 862 • **Visual Transduction (VisTrans):** Molecular Transduction in Photoreceptors.

863 The capabilities of the two libraries are discussed in what follows.

#### 864 **OlfTrans: Molecular Transduction in Olfactory Sensory Neurons**

865 The OlfTrans Library exhibits the following features and/or capabilities (see also [15]):

- 866 • a model of odorant space for olfactory encoding in the adult and larva olfactory system,
- 867 • hosts a large number of electrophysiology data of OSNs responding to different odorants  
868 with precisely controlled odorant waveforms [18].

869 Moreover, the OlfTrans Library offers

- 870 • the model of an odorant transduction process (OTP) validated by electrophysiology  
871 data and executable on Neurokernel/NeuroDriver,
- 872 • algorithms for fitting and validation of OTP models with electrophysiology data,
- 873 • algorithms for importing odorant transduction models and data into NeuroArch and  
874 execution on Neurokernel.

875 The OlfTrans Library provides critical resources in the study of any subsequent stages of  
876 the olfactory system. It serves as an entry point for discovering the function of the circuits  
877 in the olfactory system of the fruit fly.

#### 878 **VisTrans: Molecular Transduction in Photoreceptors**

879 The VisTrans Library exhibits the following features and/or capabilities (see also [19]):

- 880 • a geometrical mapping algorithm of the visual field onto photoreceptors of the retina  
881 of the fruit fly,

- 882     • a molecular model of the phototransduction process described and biologically vali-  
883       dated in [20],
- 884     • a parallel processing algorithm emulating the visual field by the entire fruit fly retina,
- 885     • algorithms for importing phototransduction models into the NeuroArch Database and  
886       for program execution on the Neurokernel Execution Engine.
- 887     • algorithms for visually evaluating photoreceptor models.

888 The VisTrans Library accelerates the study of the contribution of photoreceptors towards  
889 the overall spatiotemporal processing of visual scenes. It also serves as an entry point for  
890 discovering circuit function in the visual system of the fruit fly.



## References

- 892 1. Givon, L. E., Lazar, A. A. & Ukani, N. H. Neuroarch: a graph-based platform for  
893 constructing and querying models of the fruit fly brain architecture. *Frontiers in Neu-*  
894 *roinformatics* **42** (2014).
- 895 2. Givon, L. E. & Lazar, A. A. Neurokernel: an open source platform for emulating the  
896 fruit fly brain. *PloS one* **11**, e0146581 (2016).
- 897 3. Ukani, N. H. *et al.* The fruit fly brain observatory: from structure to function. *BioRxiv*,  
898 580290 (2019).
- 899 4. Ward Jr, J. H. Hierarchical grouping to optimize an objective function. *Journal of the*  
900 *American statistical association* **58**, 236–244 (1963).
- 901 5. Sokal, R. R. A statistical method for evaluating systematic relationships. *Univ. Kansas,*  
902 *Sci. Bull.* **38**, 1409–1438 (1958).
- 903 6. Liu, Y.-Y., Slotine, J.-J. & Barabási, A.-L. Controllability of complex networks. *nature*  
904 **473**, 167–173 (2011).
- 905 7. Ascoli, G. A., Donohue, D. E. & Halavi, M. NeuroMorpho.Org: A Central Resource  
906 for Neuronal Morphologies. *Journal of Neuroscience* **27**, 9247–9251. ISSN: 0270-6474  
907 (2007).
- 908 8. Sengupta, B., Stemmler, M., Laughlin, S. B. & Niven, J. E. Action Potential Energy  
909 Efficiency Varies Among Neuron Types in Vertebrates and Invertebrates. *PLOS Com-*  
910 *putational Biology* **6**, 1–16 (July 2010).
- 911 9. Xu, C. S. *et al.* A connectome of the adult drosophila central brain. *BioRxiv* (2020).
- 912 10. Horne, J. A. *et al.* A resource for the Drosophila antennal lobe provided by the connec-  
913 tome of glomerulus VA1v. *Elife* **7**, e37550 (2018).
- 914 11. Sussman, D. L., Tang, M., Fishkind, D. E. & Priebe, C. E. A consistent adjacency spec-  
915 tral embedding for stochastic blockmodel graphs. *Journal of the American Statistical*  
916 *Association* **107**, 1119–1128 (2012).
- 917 12. Varela, N., Gaspar, M., Dias, S. & Vasconcelos, M. L. Avoidance response to CO<sub>2</sub> in  
918 the lateral horn. *PLoS biology* **17** (2019).
- 919 13. Chiang, A.-S. *et al.* Three-dimensional reconstruction of brain-wide wiring networks in  
920 Drosophila at single-cell resolution. *Current Biology* **21**, 1–11 (2011).
- 921 14. Givon, L. E., Lazar, A. A. & Yeh, C.-H. Generating executable models of the Drosophila  
922 central complex. *Frontiers in behavioral neuroscience* **11**, 102 (2017).
- 923 15. Lazar, A. A. & Yeh, C.-H. A molecular odorant transduction model and the complexity  
924 of spatio-temporal encoding in the Drosophila antenna. *PLOS Computational Biology*  
925 (Apr. 2020).
- 926 16. Lazar, A. A. & Yeh, C.-H. *Predictive Coding in the Drosophila Antennal Lobe* 2019.
- 927 17. Lazar, A. A., Liu, T. & Yeh, C. *An Odorant Encoding Machine for Sampling, Recon-*  
928 *struction and Robust Representation of Odorant Identity in ICASSP 2020 - 2020 IEEE*  
929 *International Conference on Acoustics, Speech and Signal Processing (ICASSP)* (2020),  
930 1743–1747.
- 931 18. Kim, A. J., Lazar, A. A. & Slutskiy, Y. B. System identification of Drosophila olfactory  
932 sensory neurons. *Journal of Computational Neuroscience* **30**, 143–161 (2011).

- 933 19. Lazar, A. A., Psychas, K., Ukani, N. H. & Zhou, Y. A Parallel Processing Model of  
934 the Drosophila Retina. *Neurokernel Request for Comments, Neurokernel RFC #3.* ()  
935 (Aug. 2015).
- 936 20. Song, Z. *et al.* Stochastic, Adaptive Sampling of Information by Microvilli in Fly Pho-  
937 toreceptors. *Current Biology* **22**, 1371–1380 (2012).
